# Supplementary material for: A Study on the Differences in Urinary Iodine and Serum Iodine in Revealing the Relationship between Children's Iodine Nutrition and Lipids
Source: Research Square preprint supplement (doi:10.21203/rs.3.rs-8509887/v1), 2026-01-12
Supplement: Supplementary file 1 [file f84e2fa865932d5d4bdf28c0.docx]

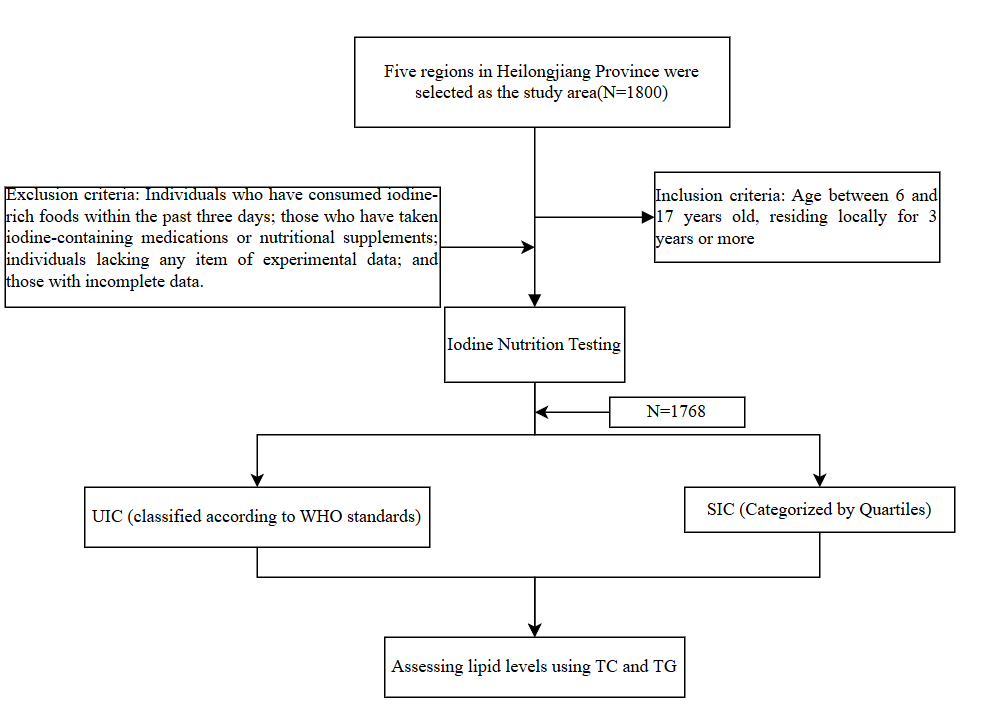


**Figure abstract**

**Supplementary Table 1** Effects of UIC and SIC on TC and TG Levels in Study Subjects Stratified by Gender, Age, and BMI

|  |  | UIC<100µg/L | UIC=100-299µg/L | UIC≥300µg/L | P | P |
| --- | --- | --- | --- | --- | --- | --- |
| AOR(95%CI) | Reference | AOR(95%CI) |
| Elevated TC | Male | 0.694(0.391,1.233) | 1.000 | 1.375(1.017,1.806) | 0.213 | 0.039 |
| Female | 1.071(0.674,1.702) | 1.000 | 1.605(1.177,2.190) | 0.722 | 0.003 |
| Age<10 years | 0.578(0.305,1.093) | 1.000 | 1.530(1.035,2.263) | 0.092 | 0.033 |
| Age≥10 years | 1.173(0.761,1.810) | 1.000 | 1.430(1.104,1.852) | 0.470 | 0.007 |
| Underweight | 1.602(0.389,6.600) | 1.000 | 6.120(2.208,16.961) | 0.514 | <0.001 |
| Normal weight | 1.294(0.800,2.092) | 1.000 | 1.352(1.006,1.816) | 0.293 | 0.046 |
| Overweight and above | 0.536(0.296,0.971) | 1.000 | 1.342(0.960,1.876) | 0.040 | 0.085 |

|  |  | SIC<63.50 | 63.50-72.62/72.62-82.28µg/L | SIC≥82.28µg/L | P | P |
| --- | --- | --- | --- | --- | --- | --- |
| AOR(95%CI) | Reference | AOR(95%CI) |
| Elevated TG | Male | 1.276(0.897,1.817) | 1.000 | 1.535(1.082,2.178) | 0.176 | 0.016 |
| Female | 1.290(0.917,1.816) | 1.000 | 1.477(1.054,2.070) | 0.143 | 0.023 |
| Age<10 years | 1.250(0.777,2.012) | 1.000 | 1.519(1.002,2.304) | 0.357 | 0.049 |
| Age≥10 years | 1.335(1.001,1.781) | 1.000 | 1.479(1.094,1.999) | 0.049 | 0.011 |
| Underweight | 2.268(0.714,1.472) | 1.000 | 2.690(0.960,7.535) | 0.165 | 0.060 |
| Normal weight | 1.044(0.741,1.472) | 1.000 | 1.266(0.908,1.767) | 0.806 | 0.165 |
| Overweight and above | 1.542(1.060,2.243) | 1.000 | 1.709(1.162,2.513) | 0.024 | 0.006 |

**Supplementary Table 2** Mediation analysis of UIC with elevated TC levels.

| Effect | Estimate(β) |
| --- | --- |
| Elevated TC |
| UIC ≥ 300 μg/L |  |
| Indirect effect | -0.002(-0.040,0.001) |
| Direct effect | 0.160(0.070,0.260) |
| Total effect | 0.150(0.060,0.240) |
